# Supplementary material for: Next-generation sequencing identifies articular cartilage and subchondral bone miRNAs after ESWT on early osteoarthritis knee
Source: PubMed Central journal article supplement (PMC5356668; doi:10.18632/oncotarget.11331), 2016-08-17
Supplement: oncotarget-07-84398-s001.pdf [file oncotarget-07-84398-s001.pdf]

## **Next-generation sequencing identifies articular cartilage and subchondral bone miRNAs after ESWT on early osteoarthritis knee**

### **SUPPLEMENTARY TABLES**

**Supplementary Data S1: The profiles and expressions of miRNA (up regulation) and gene (down regulation) in articular cartilage with comparisons between sham and OA, sham and OA+ESWT, OA and OA+ESWT.**

**See Supplemental File 1**

**Supplementary Data S2: The profiles and expressions of miRNA (down regulation) and gene (up regulation) in articular cartilage with comparisons between sham vs OA, sham vs OA+SW, and OA vs OA+SW.**

**See Supplemental File 2**

**Supplementary Data S3: The profiles and expressions of miRNA (up regulation ) and gene (down regulation) in subchondral bone with comparisons between sham vs OA, sham vs OA+SW and OA vs OA+SW.**

**See Supplemental File 3**

**Supplementary Data S4: The profiles and expressions of miRNA (down regulation) and gene (up regulation) in subchondral bone with comparisons between sham vs OA, sham vs OA+SW, and OA vs OA+SW.**

**See Supplemental File 4**
